## Long-term follow-up of cardiac resynchronization therapy patients with non-ischemic dilated cardiomyopathy assessed by radionuclide angiography

C. Valzania<sup>1</sup>, R. Bonfiglioli<sup>2</sup>, F. Fallani<sup>1</sup>, J. Frisoni<sup>1</sup>, M. Biffi<sup>1</sup>, G. Boriani<sup>3</sup>, N. Galie<sup>1</sup>

<sup>1</sup>University Hospital Polyclinic San Orsola-Malpighi, Department of Cardiology, Bologna, Italy; <sup>2</sup>Universitary Hospital Sant'orsola Malpighi, Nuclear Medicine, Bologna, Italy; <sup>3</sup>University of Modena and Reggio Emilia, Modena Polyclinic, Department of Cardiology, Modena, Italy

**Funding Acknowledgement:** Type of funding source: None

**Background:** While the beneficial effects of cardiac resynchronization therapy (CRT) have been widely investigated soon after CRT implantation, relatively few data are available on long-term clinical outcomes of CRT recipients.

**Aim:** To investigate long-term outcomes of CRT patients with non-ischemic dilated cardiomyopathy stratified as responders and non-responders according to radionuclide angiography.

**Methods:** Consecutive heart failure patients with non-ischemic dilated cardiomyopathy undergoing CRT implantation at our University Hospital between 2007 and 2013 were enrolled. All patients were assessed with equilibrium Tc99 radionuclide angiography at baseline and after 3 months of CRT. Left ventricular (LV) ejection fraction was computed on the basis of relative end-diastolic and end-systolic counts, and intraventricular dyssynchrony was derived by Fourier phase analysis. Response to CRT was defined by an absolute increase in LV ejection fraction (LVEF)  $\geq 5\%$  at 3-month follow-up. Clinical outcome was assessed after 10 years through hospital records review.

**Results:** Forty-seven patients (83% men,  $63 \pm 11$  years) were included in the study. At 3 months, 25 (53%) patients were identified as CRT responders according to LVEF increase (from  $26 \pm 8$  to  $38 \pm 12\%$ ,  $p < 0.001$ ). In these patients, LV dyssynchrony decreased from  $59 \pm 30^\circ$  to  $29 \pm 18^\circ$  ( $p < 0.001$ ). Twenty-two (47%) patients were defined as non-responders. No significant changes in LVEF and LV dyssynchrony ( $50 \pm 30^\circ$  vs.  $38 \pm 19^\circ$ ,  $p = 0.07$ ) were observed in non-responders. At long-term follow-up ( $11 \pm 2$  years), all-cause and cardiac mortality rates were 24% and 12% in responders vs. 32% and 27% in non-responders, respectively ( $p = ns$ ). Heart transplantation was performed in 3 patients. One (4%) patient among CRT responders compared with 6 (27%) patients among non-responders died of worsening heart failure ( $p = 0.03$ ).

**Conclusions:** Although late overall mortality of non-ischemic CRT recipients was not significantly different between mid-term responders and non-responders, CRT responders were at lower risk of worsening heart failure death.
